# Supplementary material
Source: PubMed Central journal article supplement (PMC2996439)
Supplement: 1010950107_pnas.1010950107_SI.pdf [file 1010950107_pnas.1010950107_SI.pdf]

# Supporting Information

Zhu et al. 10.1073/pnas.1010950107

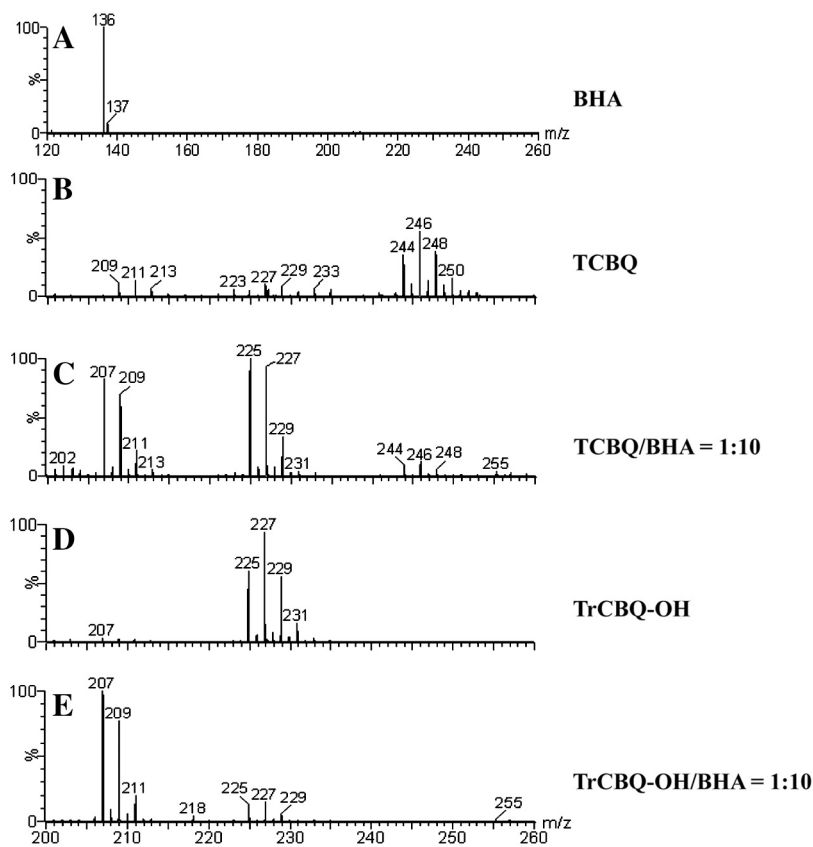

**Fig. S1.** Oxygen-18 isotope-labeling experiment. The ESI-Q-TOF-MS spectra of BHA (A), TCBQ (B), TCBQ with BHA at the ratio of 1:10 (C), TrCBQ-OH (D), and TrCBQ-OH with BHA at the ratio of 1:10 (E) in  $\text{CH}_3\text{COONH}_4$  buffer prepared with oxygen-18-labeled  $\text{H}_2\text{O}$  ( $^{18}\text{O}$ - $\text{H}_2\text{O}$ , 90%) as solvent (pH 7.0, 0.1M) at room temperature. TCBQ, 1 mM; TrCBQ-OH, 1 mM; BHA, 10 mM; All the other experimental conditions were the same as in Fig. 2 in the main article.
